# Supplementary material
Source: HighWire-hosted journal article supplement (https://www.jrheum.org/highwire/filestream/30167/field_highwire_adjunct_files/0/160596DataSuppl.pdf)
Supplement: 160596DataSuppl.pdf [file 160596DataSuppl.pdf]

## ONLINE SUPPLEMENTARY DATA

*Supplementary Table 1.* Fully-saturated Cox proportional hazards model – baseline visit predictors of all-cause mortality.

|                                            |       | <b>Hazard ratio (95% CI)</b> | <b>P</b> |
|--------------------------------------------|-------|------------------------------|----------|
| Age (years)                                | <50   | Ref                          | -        |
|                                            | 50-60 | 1.01 (0.21, 4.84)            | 0.99     |
|                                            | 60-70 | 1.97 (0.58, 6.66)            | 0.28     |
|                                            | 70-80 | 7.99 (2.04, 31.26)           | 0.0028   |
|                                            | 80-91 | 6.77 (1.40, 32.85)           | 0.018    |
| Sex (female)                               |       | 1.58 (0.74, 3.35)            | 0.24     |
| Māori or Pacific ethnicity                 |       | 2.04 (0.83, 4.99)            | 0.12     |
| Disease duration                           |       | 1.06 (0.96, 1.18)            | 0.27     |
| Flare frequency (preceding 3 months)       |       | 1.05 (0.94, 1.17)            | 0.43     |
| Smoker                                     |       | 0.83 (0.25, 2.70)            | 0.75     |
| Hypertension                               |       | 1.12 (0.53, 2.36)            | 0.77     |
| Hypercholesterolaemia                      |       | 0.79 (0.38, 1.65)            | 0.53     |
| Type 2 diabetes                            |       | 1.34 (0.56, 3.22)            | 0.51     |
| Previous history of cardiovascular disease |       | 1.17 (0.47, 2.93)            | 0.74     |
| Loop diuretic use                          |       | 3.41 (1.56, 7.47)            | 0.0021   |
| Allopurinol use                            |       | 0.73 (0.31, 1.70)            | 0.47     |
| Colchicine use                             |       | 1.39 (0.62, 3.12)            | 0.42     |
| Body mass index                            |       | 0.99 (0.93, 1.05)            | 0.69     |
| Presence of subcutaneous tophi             |       | 3.20 (1.48, 6.95)            | 0.0032   |
| Serum urate                                |       | 0.72 (0.034, 15.05)          | 0.83     |
| Serum creatinine (per 10µmol/L change)     |       | 1.03 (1.00, 1.07)            | 0.057    |

**Supplementary Table 2.** Fully-saturated Cox proportional hazards model – baseline visit predictors of cardiovascular mortality.

|                                            |       | <b>Hazard ratio (95% CI)</b> | <b>P</b> |
|--------------------------------------------|-------|------------------------------|----------|
| Age (years)                                | <50   | Ref                          | -        |
|                                            | 50-60 | 1.53 (0.20, 12.05)           | 0.69     |
|                                            | 60-70 | 0.93 (0.14, 6.17)            | 0.94     |
|                                            | 70-80 | 3.25 (0.44, 24.12)           | 0.25     |
|                                            | 80-91 | 5.27 (0.61, 45.72)           | 0.12     |
| Sex (female)                               |       | 2.95 (1.01, 8.63)            | 0.049    |
| Māori or Pacific ethnicity                 |       | 0.80 (0.19, 3.32)            | 0.76     |
| Disease duration                           |       | 1.09 (0.94, 1.25)            | 0.25     |
| Flare frequency (preceding 3 months)       |       | 0.95 (0.78, 1.16)            | 0.61     |
| Smoker                                     |       | 0.45 (0.05, 4.00)            | 0.47     |
| Hypertension                               |       | 1.45 (0.51, 4.14)            | 0.49     |
| Hypercholesterolaemia                      |       | 0.77 (0.28, 2.15)            | 0.62     |
| Type 2 diabetes                            |       | 1.12 (0.35, 3.65)            | 0.84     |
| Previous history of cardiovascular disease |       | 3.37 (0.84, 13.57)           | 0.088    |
| Loop diuretic use                          |       | 2.31 (0.87, 6.17)            | 0.093    |
| Allopurinol use                            |       | 0.66 (0.21, 2.03)            | 0.46     |
| Colchicine use                             |       | 2.49 (0.80, 7.70)            | 0.11     |
| Body mass index                            |       | 0.96 (0.88, 1.06)            | 0.44     |
| Presence of subcutaneous tophi             |       | 2.73 (0.98, 7.61)            | 0.056    |
| Serum urate                                |       | 1.82 (0.028, 118.02)         | 0.78     |
| Serum creatinine (per 10µmol/L change)     |       | 1.04 (0.99, 1.09)            | 0.147    |

*Supplementary Table 3.* Multivariate adjusted proportional hazards for baseline predictors of cardiovascular mortality. Reduced model includes all variables with  $P < 0.15$  in the fully saturated model.

|                                              | <b>Hazard ratio (95% CI)</b> | <b>P</b> |
|----------------------------------------------|------------------------------|----------|
| Female sex                                   | 2.59 (1.14, 5.91)            | 0.023    |
| Previous history of cardiovascular disease   | 4.05 (1.20, 13.66)           | 0.024    |
| Loop diuretic use                            | 2.50 (0.98, 6.37)            | 0.054    |
| Colchicine use                               | 1.13 (0.46, 2.77)            | 0.79     |
| Presence of subcutaneous tophi               | 3.13 (1.38, 7.10)            | 0.006    |
| Serum creatinine (per 10 $\mu$ mol/L change) | 1.02 (0.98, 1.06)            | 0.27     |

**Supplementary Table 4.** Fully-saturated Cox proportional hazards model – baseline visit predictors of non-cardiovascular death.

|                                            |       | <b>Hazard ratio (95% CI)</b> | <b>P</b> |
|--------------------------------------------|-------|------------------------------|----------|
| Age (years)                                | <50   | Ref                          | -        |
|                                            | 50-60 | 0.00 (0.00, )                | 0.99     |
|                                            | 60-70 | 5.15 (0.93, 28.65)           | 0.061    |
|                                            | 70-80 | 19.83 (2.60, 151.38)         | 0.004    |
|                                            | 80-91 | 5.57 (0.37, 83.10)           | 0.21     |
| Sex (female)                               |       | 0.86 (0.28, 2.69)            | 0.80     |
| Māori or Pacific ethnicity                 |       | 3.92 (1.09, 14.10)           | 0.04     |
| Disease duration                           |       | 1.06 (0.88, 1.28)            | 0.53     |
| Flare frequency (preceding 3 months)       |       | 1.09 (0.93, 1.27)            | 0.28     |
| Smoker                                     |       | 1.05 (0.20, 5.57)            | 0.95     |
| Hypertension                               |       | 0.82 (0.25, 2.65)            | 0.74     |
| Hypercholesterolaemia                      |       | 0.77 (0.24, 2.46)            | 0.66     |
| Type 2 diabetes                            |       | 1.98 (0.42, 9.24)            | 0.39     |
| Previous history of cardiovascular disease |       | 0.37 (0.09, 1.55)            | 0.17     |
| Loop diuretic use                          |       | 6.25 (1.56, 25.08)           | 0.01     |
| Allopurinol use                            |       | 0.88 (0.21, 3.73)            | 0.86     |
| Colchicine use                             |       | 0.73 (0.20, 2.61)            | 0.63     |
| Body mass index                            |       | 1.03 (0.94, 1.12)            | 0.55     |
| Presence of subcutaneous tophi             |       | 3.85 (1.04, 14.31)           | 0.04     |
| Serum urate                                |       | 0.22 (0.001, 36.26)          | 0.56     |
| Serum creatinine (per 10µmol/L change)     |       | 1.03 (0.97, 1.09)            | 0.39     |

*Supplementary Table 5.* Multivariate adjusted proportional hazards for baseline predictors of non-cardiovascular mortality. Reduced model includes all variables with P<0.15 in the fully saturated model.

|                                |       | <b>Hazard ratio (95% CI)</b> | <b>P</b> |
|--------------------------------|-------|------------------------------|----------|
| Age (years)                    | <50   | ref                          | -        |
|                                | 50-60 | 0.00 (0.00)                  | 0.99     |
|                                | 60-70 | 2.52 (0.61, 10.44)           | 0.20     |
|                                | 70-80 | 9.21 (2.03, 41.71)           | 0.004    |
|                                | 80-91 | 4.19 (0.57, 30.69)           | 0.16     |
| Māori or Pacific ethnicity     |       | 4.24 (1.42, 12.72)           | 0.010    |
| Loop diuretic use              |       | 3.98 (1.51, 10.41)           | 0.005    |
| Presence of subcutaneous tophi |       | 3.48 (1.25, 9.63)            | 0.017    |
